# Supplementary material
Source: PubMed Central journal article supplement (PMC6646058)
Supplement: NIHMS1530063-supplement-Supplemental_Material.pdf [file NIHMS1530063-supplement-Supplemental_Material.pdf]

**SUPPLEMENTAL MATERIAL**

**Patterns and Outcomes of Endovascular Therapy in Mild Stroke: A Florida-Puerto Rico**

**Collaboration**

**Supplemental Table I:** Final multivariable model to determine independent factors associated with mild neurological symptomatology in patients who received endovascular treatment.

| <b>Variable</b>                               | <b>Comparison</b>                  | <b>OR (CI)</b>    | <b>P Value</b> |
|-----------------------------------------------|------------------------------------|-------------------|----------------|
| <b>Gender</b>                                 | Male vs Female                     | 1.32 (0.98, 1.78) | 0.0664         |
| <b>Age</b>                                    | 18 to 64 vs. 80 and above          | 2.02 (1.45, 2.82) | <.0001         |
| <b>Age</b>                                    | 65 to 79 vs. 80 and above          | 1.55 (1.19, 2.00) | 0.0009         |
| <b>Medical history of Atrial fibrillation</b> | No vs. Yes                         | 1.34 (1.04, 1.71) | 0.0213         |
| <b>Medical history of Hypertension</b>        | Yes vs. No                         | 1.55 (1.17, 2.05) | 0.0023         |
| <b>Arrival by EMS</b>                         | No vs. Yes                         | 5.49 (3.49, 8.64) | <.0001         |
| <b>Insurance Status</b>                       | Private vs. Medicare               | 1.48 (1.09, 2.02) | 0.0127         |
| <b>Insurance Status</b>                       | No Insurance vs. Medicare          | 1.34 (0.78, 2.30) | 0.2858         |
| <b>Insurance Status</b>                       | Unknown vs. Medicare               | 1.48 (1.09, 2.02) | 0.0127         |
| <b>Onset to arrival time</b>                  | Every hour increase                | 1.05 (1.03, 1.08) | <.0001         |
| <b>Aphasia</b>                                | No vs. Yes                         | 0.85 (0.56, 1.30) | 0.4578         |
| <b>Weakness</b>                               | No vs. Yes                         | 1.85 (1.35, 2.52) | 0.0001         |
| <b>Hospital size ( Number of beds)</b>        | Small vs. Large                    | 1.73 (1.06, 2.80) | 0.0268         |
| <b>Prior ambulatory status</b>                | Independent vs. Unable/with assist | 2.05 (1.20, 3.50) | 0.0082         |

**Supplemental Table II:** Comparison of the characteristic of the EVT patients in the missing NIHSS category with all patients with a known NIHSS and those with NIHSS $\leq$  5 and NIHSS $>$ 5.

|                                                     | Missing NIHSS     | Not missing NIHSS | P value | Missing NIHSS     | NIHSS $\leq$ 5   | NIHSS $>$ 5       | P value |
|-----------------------------------------------------|-------------------|-------------------|---------|-------------------|------------------|-------------------|---------|
|                                                     | (n= 324)          | (n=3,786)         |         | (n=324)           | (n=446)          | (n=3,340)         |         |
| <b>Age, Median, IQR</b>                             | 70, (58-81)       | 73,(62-82)        | 0.014   | 70, (58-81)       | 68, (58-77)      | 74, (63-82)       | <.0001  |
| <b>Arrived by EMS, %</b>                            | 91.05%            | 92.68%            | 0.28    | 91.05%            | 78.70%           | 94.55%            | <.0001  |
| <b>Small vs medium or large hospital arrival, %</b> | 0.62%             | 1.06%             | 0.77    | 0.62%             | 1.12%            | 1.05%             | 0.80    |
| <b>Transferred to the treating hospital, %</b>      | 28.75%            | 19.29%            | <.0001  | 28.75%            | 19.87%           | 14.94%            | <.0001  |
| <b>Off hour vs. On hour arrival</b>                 | 54.63%            | 52.98%            | 0.5690  | 54.63%            | 49.55%           | 53.44%            | 0.2570  |
| <b>Onset-to-Arrival Time (hrs), Median, IQR</b>     | 3.27, (1.10-6.78) | 1.75, (0.78-4.58) | <.0001  | 3.27, (1.10-6.78) | 2.30, (1.0-6.12) | 1.68 (0.77, 4.42) | <.0001  |
| <b>Received IV alteplase, %</b>                     | 16.67%            | 40.78%            | <.0001  | 16.67%            | 30.27%           | 42.19%            | <.0001  |

## FL-PR Stroke Registry Collaborators:

### Florida:

|                                          |                                                  |
|------------------------------------------|--------------------------------------------------|
| Baptist Hospital                         | Florida Hospital Zephyrhills, Inc.               |
| Baptist Medical Center Jacksonville      | Florida Medical Center - A Campus of North Shore |
| Baptist Medical Center Beaches           | Good Samaritan Medical Center                    |
| Baptist Medical Center South             | Gulf Coast Medical Center                        |
| Bayfront Health Dade City                | Health Park Medical Center                       |
| Bayfront Health Punta Gorda              | Hialeah Hospital                                 |
| Bayfront St. Petersburg                  | Holmes Regional Medical Center                   |
| Bethesda Hospital East                   | Holy Cross Hospital                              |
| Boca Raton Regional Hospital             | Jackson Memorial Hospital                        |
| Broward Health Coral Springs             | Jackson North Medical Center                     |
| Broward Health Imperial Point            | Jackson South Community Hospital                 |
| Broward Health Medical Center            | JFK Medical Center                               |
| Broward Health North                     | Jupiter Medical Center                           |
| Cape Coral Hospital                      | Lakeland Regional Medical Center                 |
| Citrus Memorial Hospital                 | Largo Medical Center                             |
| Cleveland Clinic                         | Lee Memorial Hospital                            |
| Coral Gables Hospital                    | Manatee Memorial Hospital                        |
| Delray Medical Center                    | Mayo Clinic Jacksonville                         |
| Doctors Hospital Of Sarasota             | Mease Countryside Hospital                       |
| Doctor P. Phillips Hospital              | Mease Dunedin Hospital                           |
| Florida Hospital Altamonte               | Memorial Hospital Pembroke                       |
| Florida Hospital Apopka                  | Memorial Hospital West                           |
| Florida Hospital Celebration Health      | Memorial Regional Hospital                       |
| Florida Hospital East Orlando            | Morton Plant Hospital                            |
| Florida Hospital Kissimmee               | Morton Plant North Bay Hospital                  |
| Florida Hospital Memorial Medical Center | Mt. Sinai Medical Center                         |
| Florida Hospital North Pinellas          | Munroe Regional Medical Center                   |
| Florida Hospital Orlando                 | NCH Downtown Naples Hospital                     |
| Florida Hospital Tampa                   |                                                  |

North Bay Hospital – New Port Richey  
North Shore Medical Center  
Northside Hospital and Tampa Bay Heart  
Institute  
Orlando Regional Medical Center  
Palm Beach Gardens Medical Center  
Palmetto General Hospital  
Sacred Heart Hospital  
Saint Anthony's Hospital  
Saint Joseph's Hospital  
Saint Mary's Medical Center  
Sarasota Memorial Hospital  
South Florida Baptist Hospital  
Tallahassee Memorial Hospital  
Tampa General Hospital  
UF Health at Jacksonville  
University of Florida Shands Hospital -  
Gainesville  
University of Miami Hospital  
West Boca Medical Center  
West Florida Hospital  
Westside Regional Medical Center  
Winter Haven Hospital  
Winter Park Memorial Hospital

**Puerto Rico:**

Hospital Dr. Cayetano Coll y Toste

Hospital Metropolitano Dr. Pila

Hospital Metropolitano Guaynabo

Hospital Metropolitano Dr. Susoni

Hospital San Francisco

Hospital HIMA San Pablo-Bayamón

Hospital HIMA San Pablo-Caguas

Hospital HIMA San Pablo-Fajardo (Hospital San Pablo Del Este)

Hospital HIMA San Pablo-Humacao

Hospital Manatí Medical Center

Hospital Menonita Caguas

Hospital Santa Rosa

Puerto Rico Medical Center

University of Puerto Rico Hospital
